# Supplementary material for: Feasibility of novel (H3C)nX(SiH3)3−ncompounds (X = B, Al, Ga, In): structure, stability, reactivity, and Raman characterization from ab initio calculations
Source: Royal Society of Chemistry journal article supplement (doi:10.1039/c4dt03406f), 2015-01-01
Supplement: c4dt03406f1.pdf [file c4dt03406f1.pdf]

## Electronic supplementary material

# Feasibility of novel $(\text{H}_3\text{C})_n\text{X}(\text{SiH}_3)_{3-n}$ compounds ( $\text{X} = \text{B}, \text{Al}, \text{Ga}, \text{In}$ ): structure, stability, reactivity, and Raman characterization from *ab initio* calculations

Renato B. dos Santos<sup>a,b</sup>, R. Rivelino<sup>a</sup>, F. de B. Mota<sup>a</sup>, A. Kakanakova-Georgieva<sup>b</sup>,  
G. K. Gueorguiev<sup>b</sup>

<sup>a</sup>Instituto de Física, Universidade Federal da Bahia, 40210-340 Salvador, Bahia, Brazil

<sup>b</sup>Department of Physics, Chemistry and Biology, IFM, Linköping University, SE-58183 Linköping,  
Sweden

**Table S1** The lowest frequency ( $\nu_{\min}$ ) (in  $\text{cm}^{-1}$ ) and molecular dipole moment ( $M$ ) (in D) of the  $(\text{H}_3\text{C})_n\text{X}(\text{SiH}_3)_{3-n}$  compounds with MP2 and PW91 (values in parenthesis).

| $n$ | $\nu_{\min}$     | $M$            | $\nu_{\min}$     | $M$            | $\nu_{\min}$     | $M$            | $\nu_{\min}$     | $M$            |
|-----|------------------|----------------|------------------|----------------|------------------|----------------|------------------|----------------|
|     | B                |                | Al               |                | Ga               |                | In               |                |
| 0   | 39.44<br>(63.38) | 0.13<br>(0.08) | 27.56<br>(8.73)  | 0.00<br>(0.00) | 25.74<br>(20.43) | 0.00<br>(0.05) | 23.97<br>(10.05) | 0.00<br>(0.04) |
| 1   | 45.98<br>(47.25) | 1.18<br>(1.34) | 8.58<br>(21.14)  | 1.12<br>(1.33) | 14.46<br>(22.12) | 0.98<br>(1.19) | 14.96<br>(14.00) | 0.90<br>(1.10) |
| 2   | 31.04<br>(39.64) | 1.21<br>(1.41) | 8.74<br>(13.94)  | 1.24<br>(1.40) | 7.86<br>(14.77)  | 1.04<br>(1.24) | 10.34<br>(10.69) | 0.92<br>(1.13) |
| 3   | 11.97<br>(39.97) | 0.00<br>(0.03) | 43.80<br>(26.69) | 0.00<br>(0.00) | 48.07<br>(21.34) | 0.00<br>(0.00) | 27.46<br>(4.45)  | 0.00<br>(0.00) |

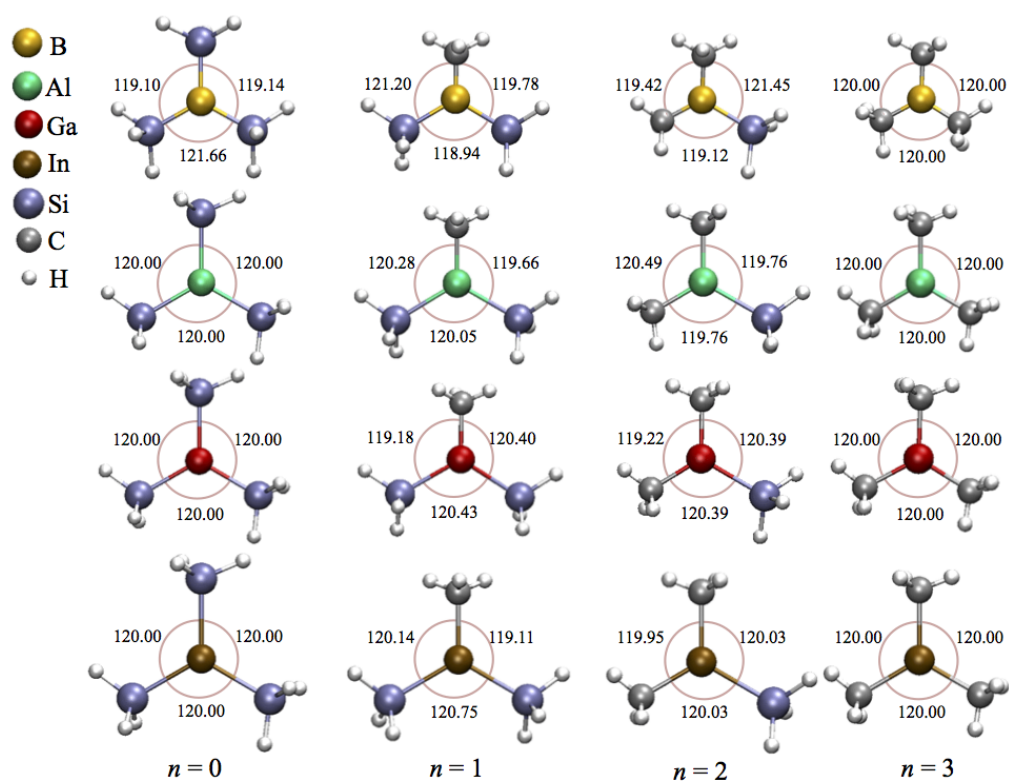

**Fig. S1** Optimized angles at the MP2 level of theory for the  $(\text{H}_3\text{C})_n\text{X}(\text{SiH}_3)_{3-n}$  compounds.



**Table S3** Bader analysis for the charge transfer (in e<sup>-</sup>) in all (H<sub>3</sub>C)<sub>n</sub>X(SiH<sub>3</sub>)<sub>3-n</sub> compounds with MP2 and PW91 (in parenthesis)\*.

| <i>n</i> | B       |         |         | Al      |         |         | Ga      |         |         | In      |         |         |
|----------|---------|---------|---------|---------|---------|---------|---------|---------|---------|---------|---------|---------|
|          | B       | Si      | C       | Al      | Si      | C       | Ga      | Si      | C       | In      | Si      | C       |
| 0        | -2.91   | +0.97   | ---     | +2.92   | -0.97   | ---     | +0.52   | -0.17   | ---     | +0.55   | -0.18   | ---     |
|          | (-3.01) | (+1.00) | ---     | (+2.91) | (-0.97) | ---     | (+0.32) | (-0.11) | ---     | (+2.39) | (-0.79) | ---     |
| 1        | -0.90   | +0.96   | -1.02   | +2.92   | -0.97   | -0.98   | +0.91   | -0.21   | -0.49   | +0.83   | -0.21   | -0.41   |
|          | (-0.93) | (+0.98) | (-1.03) | (+2.91) | (-0.97) | (-0.97) | (+0.68) | (-0.14) | (-0.39) | (+2.62) | (-1.12) | (-0.31) |
| 2        | +1.07   | +0.95   | -1.01   | +2.92   | -0.96   | -0.98   | +1.26   | -0.25   | -0.50   | +1.12   | -0.24   | -0.44   |
|          | (+1.07) | (+0.96) | (-1.01) | (+2.91) | (-0.97) | (-0.97) | (+1.04) | (-0.21) | (-0.42) | (+2.92) | (-2.21) | (-0.35) |
| 3        | +2.96   | ---     | -0.98   | +2.92   | ---     | -0.98   | +1.53   | ---     | -0.51   | +1.36   | ---     | -0.45   |
|          | (+2.95) | ---     | (-0.98) | (+2.91) | ---     | (-0.97) | (+1.38) | ---     | (-0.46) | (+1.10) | ---     | (-0.36) |

\*Atomic charges with hydrogens summed into heavy atoms

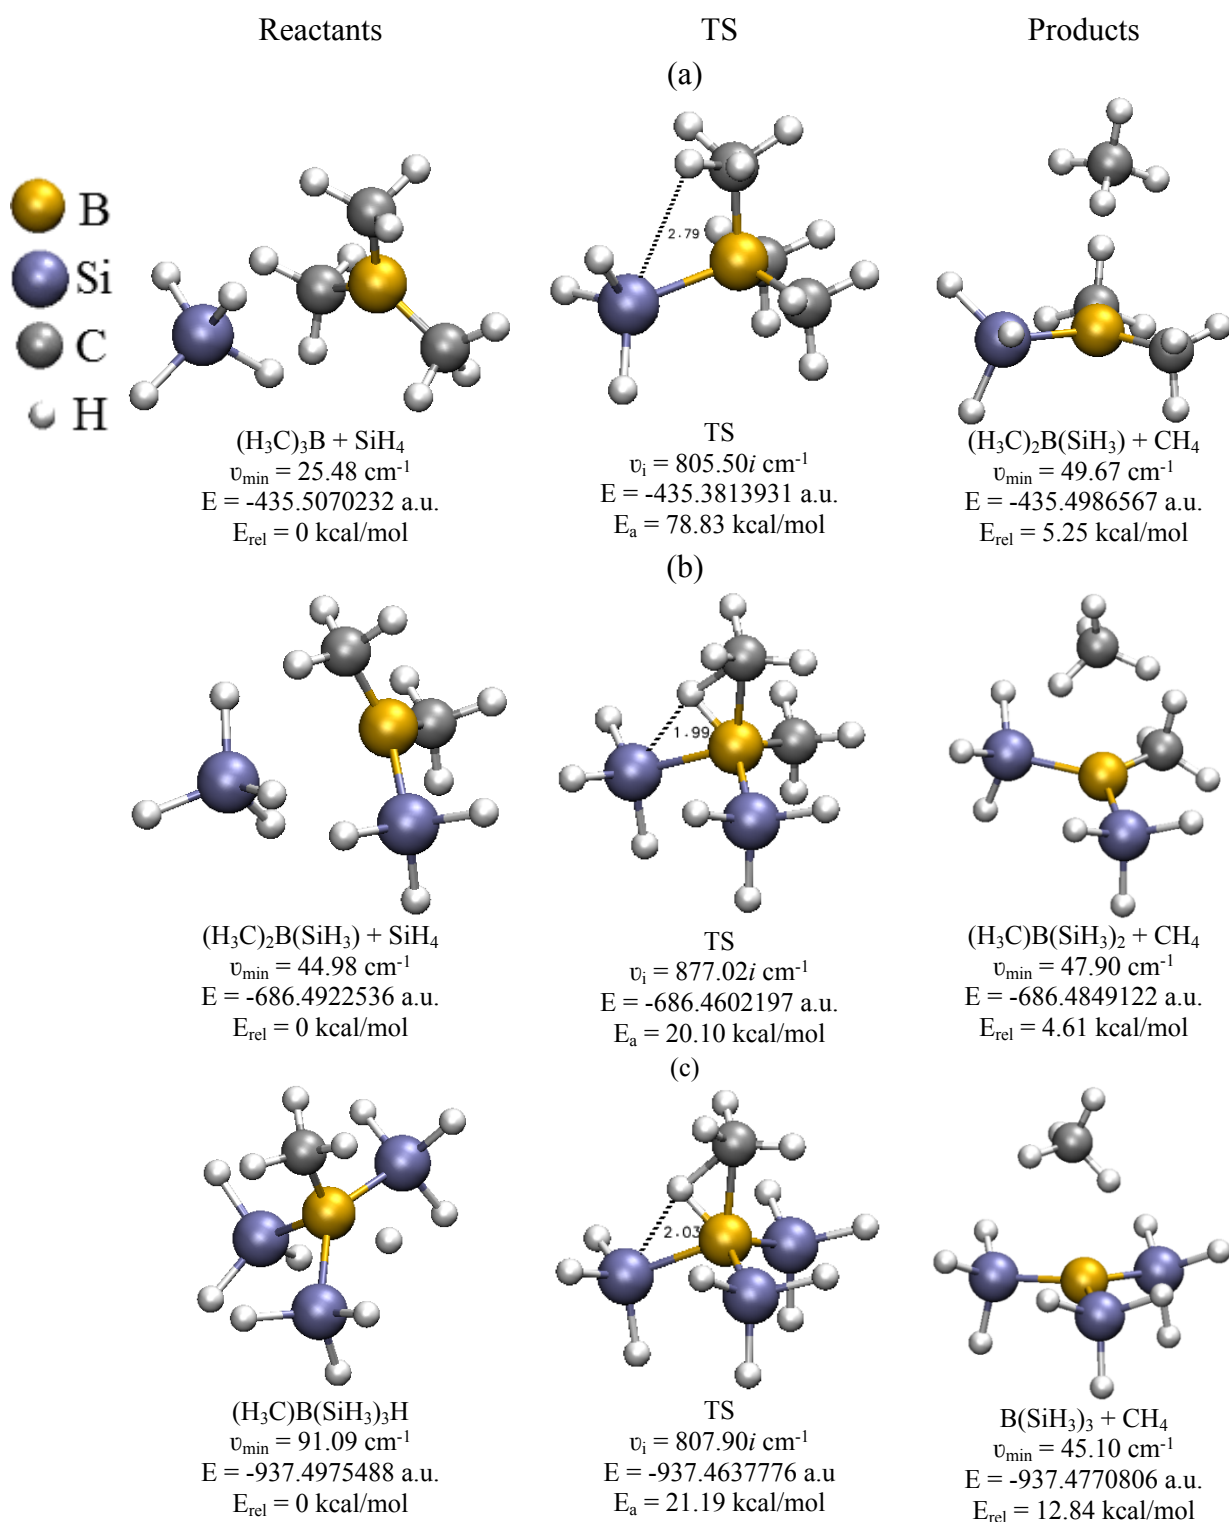

**Fig. S2:** Reactants, TS (one imaginary frequency), and products of the reactions with silane calculated with MP2/STQN: (a) Ia  $\rightarrow$  IIa, (b) IIIa  $\rightarrow$  IVa, and (c) reaction Va  $\rightarrow$  VIa for X = B. In step (Va  $\rightarrow$  VIa) it is observed a formation of an adduct involving the H atom, characterized as an energy minimum.

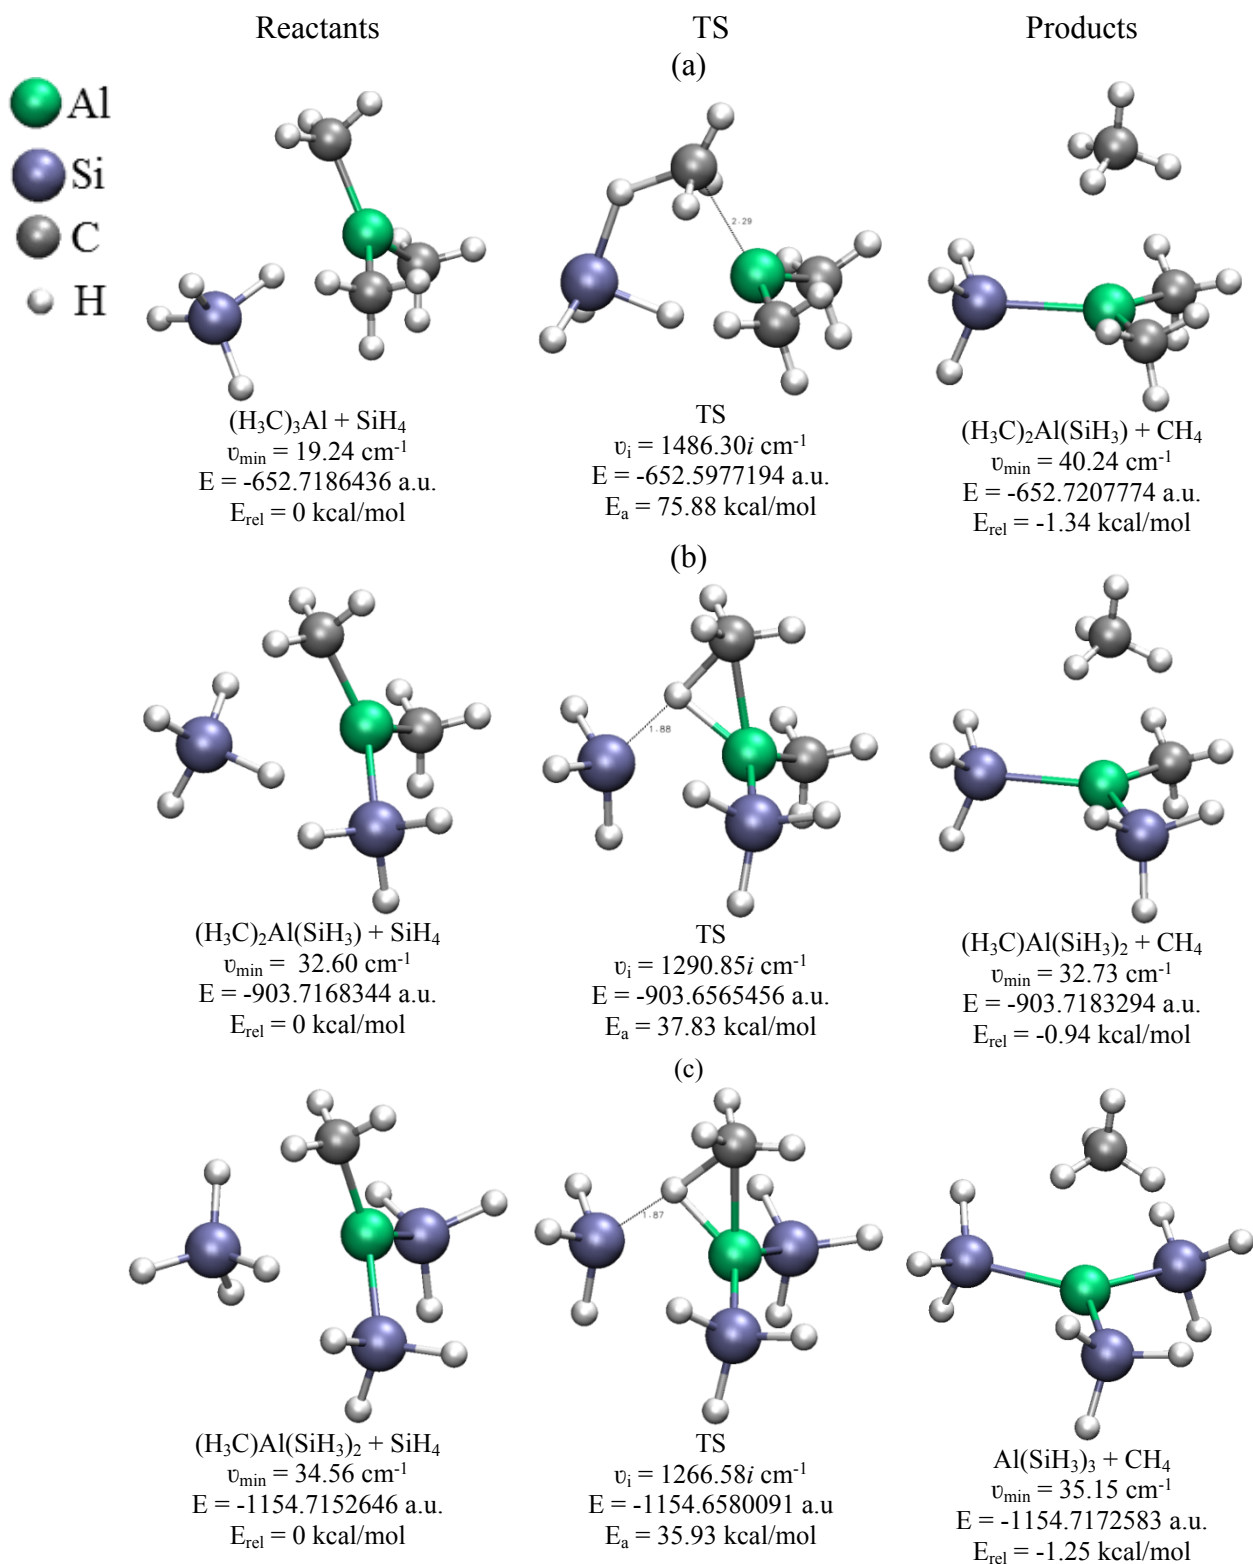

**Fig. S3** Reactants, TS (one imaginary frequency), and products of the reactions with silane calculated with MP2/STQN: (a) Ib  $\rightarrow$  IIb, (b) IIIb  $\rightarrow$  IVb, and (c) reaction Vb  $\rightarrow$  VIb for X = Al.

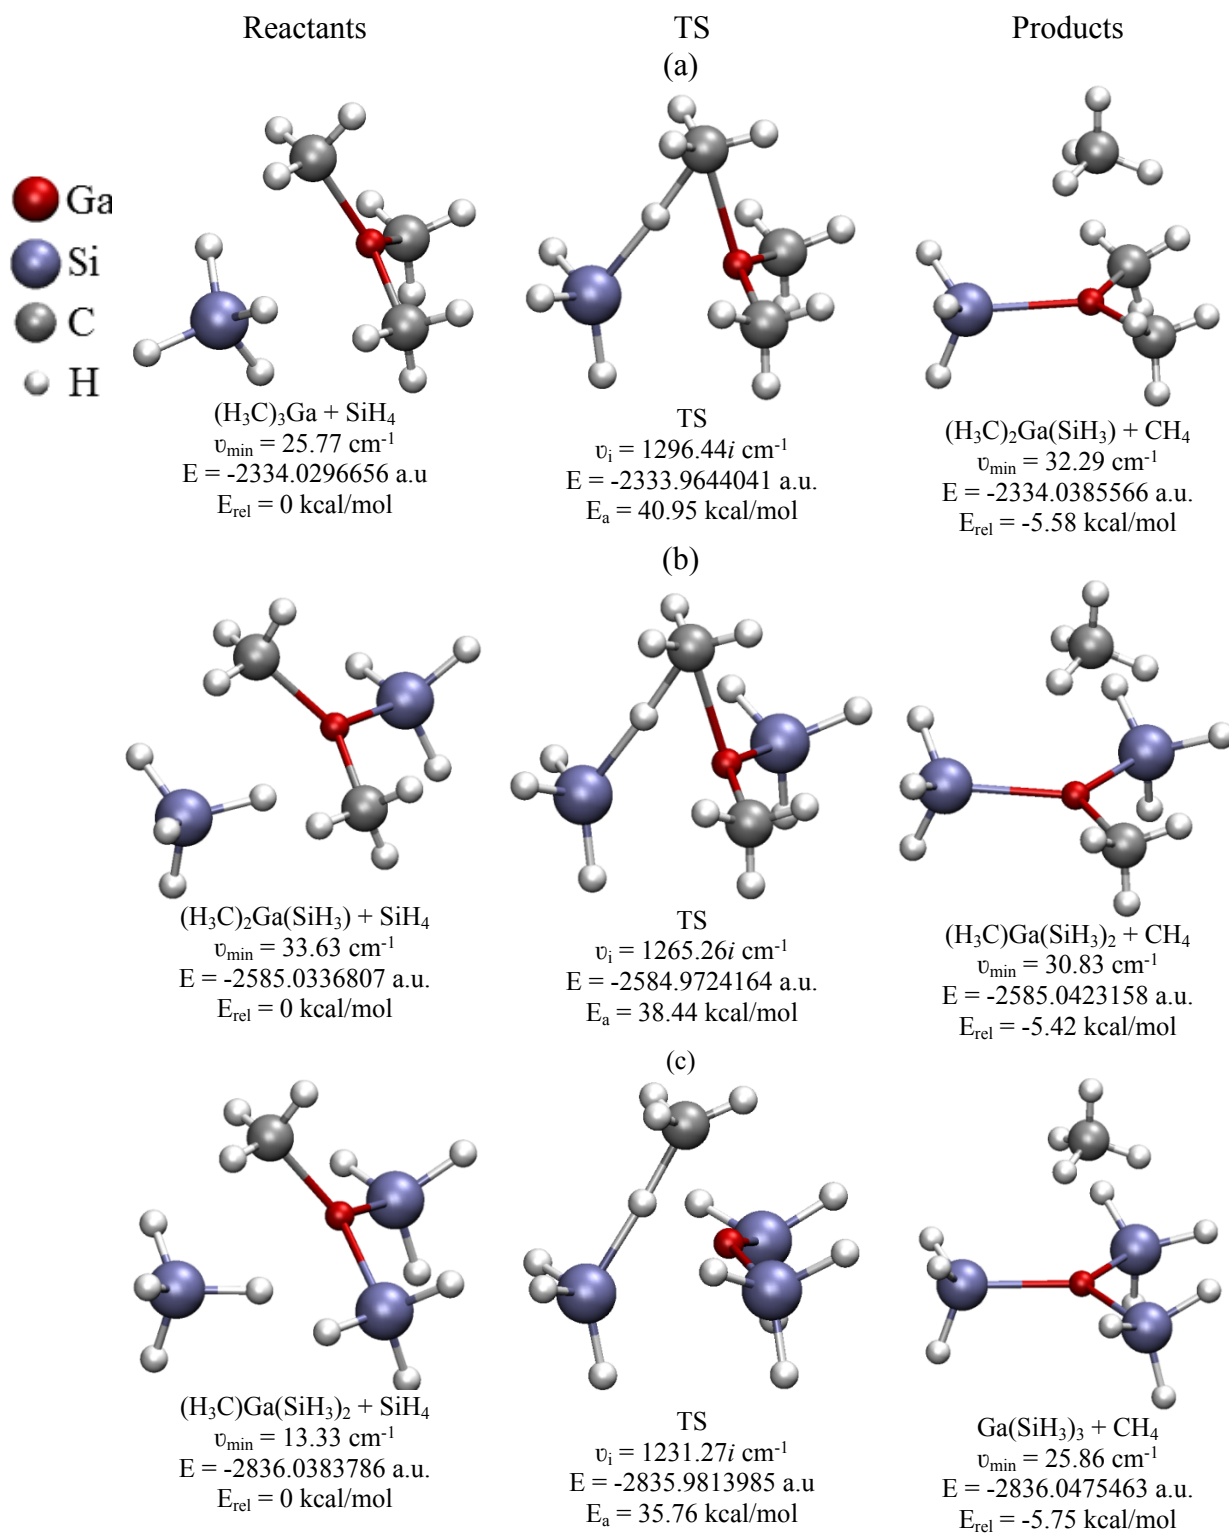

**Fig. S4** Reactants, TS (one imaginary frequency), and products of the reactions with silane calculated with MP2/STQN: (a) Ic  $\rightarrow$  IIc, (b) IIIc  $\rightarrow$  IVc, and (c) reaction Vc  $\rightarrow$  VIc for X = Ga.

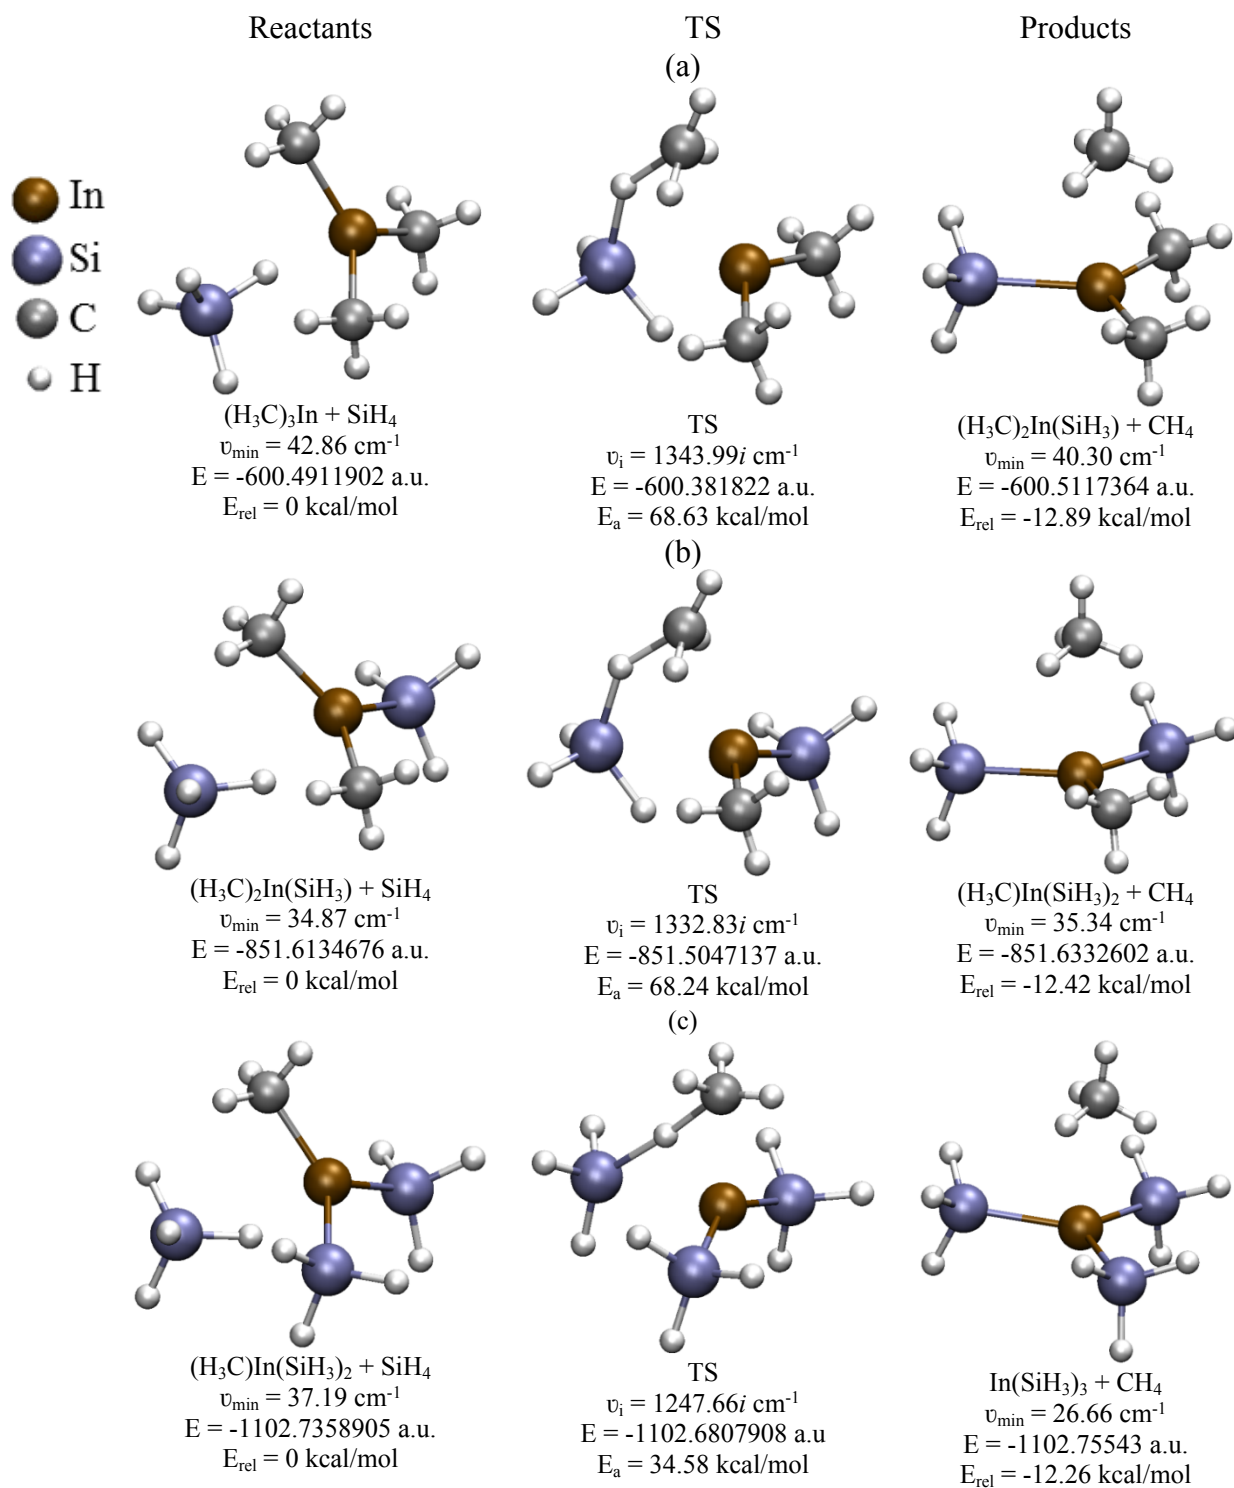

**Fig. S5** Reactants, TS (one imaginary frequency), and products of the reactions with silane calculated with MP2/STQN: (a) Id → IId, (b) IIIId → IVd, and (c) reaction Vd → VId for X = In.
